# Supplementary material for: A record ammonia adsorption by calcium chloride confined in covalent organic frameworks
Source: Royal Society of Chemistry journal article supplement (doi:10.1039/d1cc06308a), 2021-12-14
Supplement: d1cc06308a1.pdf [file d1cc06308a1.pdf]

## Electronic Supplementary Information

### **A Record Ammonia Adsorption of Calcium Chloride Confined in Covalent Organic Frameworks**

Xiaoxin Tian, Jikuan Qiu\*, Zhenzhen Wang, Yongkui Chen, Zhiyong Li,

Huiyong Wang, Yuling Zhao, and Jianji Wang\*

Collaborative Innovation Center of Henan Province for Green Manufacturing of Fine Chemicals, School of Chemistry and Chemical Engineering, Key Laboratory of Green Chemical Media and Reactions Ministry of Education, Henan Normal University Xixiang, Henan 453007 (P. R. China)

E-mail: qiujikuan@htu.edu.cn; jwang@htu.edu.cn

#### Table of Contents

Section S1. Materials and Methods (pages S2-S3)

Section S2. Figures S1-11 (pages S4-S8)

Section S3. Tables S1-3 (pages S9-S10)

Section S4. References (page S10)

## Section S1. Materials and methods

2,4,6-Tris(4-amino phenyl)-s-triazine (TAPT) ( $\geq 95\%$ ), 2,5-dimethoxyterephthalaldehyde (DMTA) ( $\geq 97\%$ ) were purchased from Shanghai Aladdin Biochemical Technology Co., Ltd. Organic solvents such as O-dichlorobenzene (O-DCB) (extra pure), 1-butanol (BuOH) ( $\geq 99.4\%$ ), acetic acid (99.7+%), tetrahydrofuran (THF) ( $\geq 99\%$ , AR), anhydrous MeOH ( $\geq 99.5\%$ ), N,N-dimethylformamide (DMF) ( $\geq 99.5\%$ ), acetone ( $\geq 99.5\%$ ), anhydrous  $\text{CaCl}_2$  ( $\geq 96\%$ ) and n-hexane ( $\geq 99.5\%$ ) were purchased from Sinopharm chemical reagent Co., Ltd and used without further purification.

Power X-ray diffraction (PXRD) data were obtained with an X' Pert3 powder diffractometer at 40 kV and 40 mA with Cu K $\alpha$  radiation from  $2\theta = 2^\circ$  to  $40^\circ$  in  $0.05^\circ$  increment. Fourier transform mid-infrared (FT-MIR) and far-infrared spectra (FIR) of the samples were collected on a Spectrum 400 spectrometer (Perkin-Elmer). Nitrogen adsorption and desorption isotherms were measured at 77 K using a ASiQwin Quantachrome instrument. The samples were treated at  $150^\circ\text{C}$  for 8 h before measurements. Specific surface areas were calculated from the adsorption data using Brunauer-Emmett-Teller (BET) methods. Pore size distribution data were calculated based on the nonlocal density functional theory (NLDFT) model. Field emission scanning electron microscopy (FE-SEM) observations were performed on a Hitachi SU8010 microscope operated at an accelerating voltage of 10.0 kV. Transmission electron microscopy (TEM) and energy dispersive X-Ray spectroscopy (EDX) images were obtained on a Tecnai G2 F20 S-TWIN electron microscope. The X-ray photoelectron spectrum (XPS) was recorded on a Thermo Scientific K-Alpha electron energy spectrometer using Al K $\alpha$  (1486.6 eV) radiation as the X-ray excitation source.

$\text{NH}_3$  sorption isotherms were measured at  $25.0^\circ\text{C}$  and up to 1 bar of gas pressure using a gas adsorption analyzer (Beishide Instrument 3H-2000PM analyzer). Purity of ammonia gas used in measurements was 99.999% (v/v). Before sorption, approximately 50 mg of sample was loaded in the tube and activated under vacuum at  $80.0^\circ\text{C}$  for 10 h. Ammonia breakthrough experiments were performed by a 3P

mixSorb SHP instrument. Typically, approximately 50 mg of sample was activated at 80 °C under N<sub>2</sub> for 3 h and tested at an ammonia challenge content of 9000 ppm (0.9%) in N<sub>2</sub> with a flow rate of 40 mL/min at 50 °C.

### **Synthesis of TAPT-DMTA COF**

A mixture of BuOH/*o*-DCB (2.5 mL/2.5 mL), 2, 4, 6-tris(4-aminophenyl)-s-triazine (141.8 mg, 0.40 mmol), 2,5-dimethoxyterephthalaldehyde (116.5 mg, 0.60 mmol), and an aqueous acetic acid solution (6 M, 0.5 mL) was degassed in a Pyrex tube (10 mL) by three freeze-pump-thaw cycles. The tube was sealed and heated at 120 °C for 3 days. The precipitate was collected by filtration, washed with THF, DMF, acetone, and MeOH, and then dried at 120 °C under vacuum overnight to give TAPT-DMTA COF in 90% yield.

### **Synthesis of CaCl<sub>2</sub>@COF-x hybrids**

The CaCl<sub>2</sub>@COF-x was synthesized by slight modification of the double solvent method adopted by Xu et al <sup>[1]</sup> and Vaidhyanathan et al <sup>[2]</sup>. Taking CaCl<sub>2</sub>@COF-34% as an example, the original COF (60 mg) was dispersed in 30 mL of n-hexane and the mixture was sonicated for about 30 min to result in a yellow dispersion. To this, a clear methanolic solution of CaCl<sub>2</sub> (40 mg in 0.2 mL of MeOH) was added drop by drop under vigorous stirring. The system was stirred for 12h at room temperature. The solid particles were extracted by filtration and then dried at 100 °C under vacuum for 12h. By using similar procedures, the hybrid materials with different calcium chloride loadings were prepared: CaCl<sub>2</sub>@COF-6% (3.2 mg of CaCl<sub>2</sub>, 60 mg COF); CaCl<sub>2</sub>@COF-11% (6.7mg of CaCl<sub>2</sub>, 60 mg COF) and CaCl<sub>2</sub>@COF-26% (20 mg of CaCl<sub>2</sub>, 60mg COF). The Ca content in each hybrid material was estimated by ICP-OES after digesting the as-made samples in H<sub>2</sub>SO<sub>4</sub> at 50 °C.

Section S2. Figures S1-11

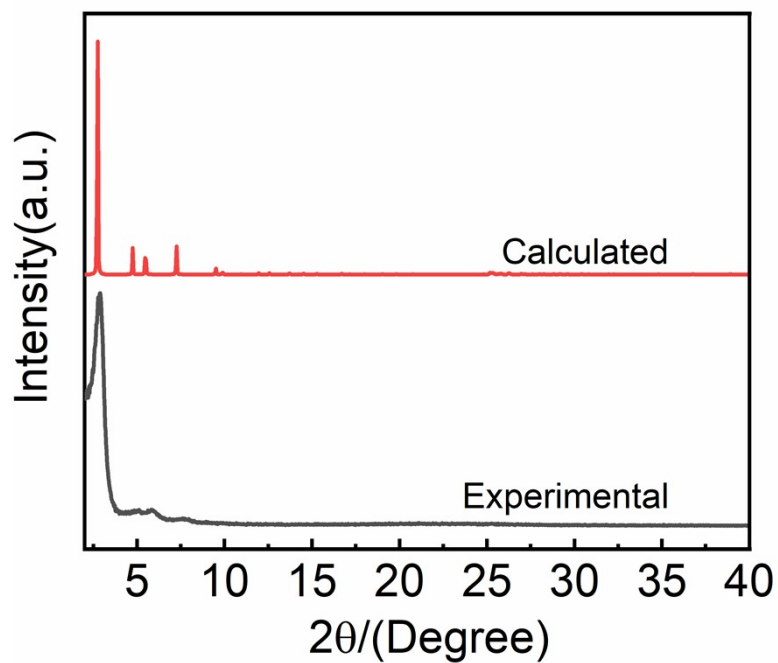

**Figure S1.** The experimentally observed and calculated PXRD patterns of TAPT-DMTA COF.

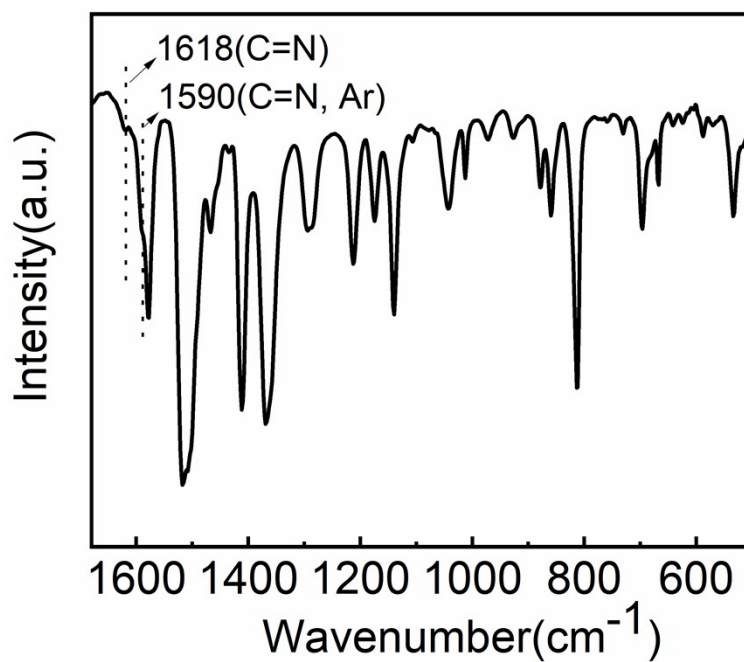

**Figure S2.** FT-IR spectra of the as-synthesized TAPT-DMTA COF.

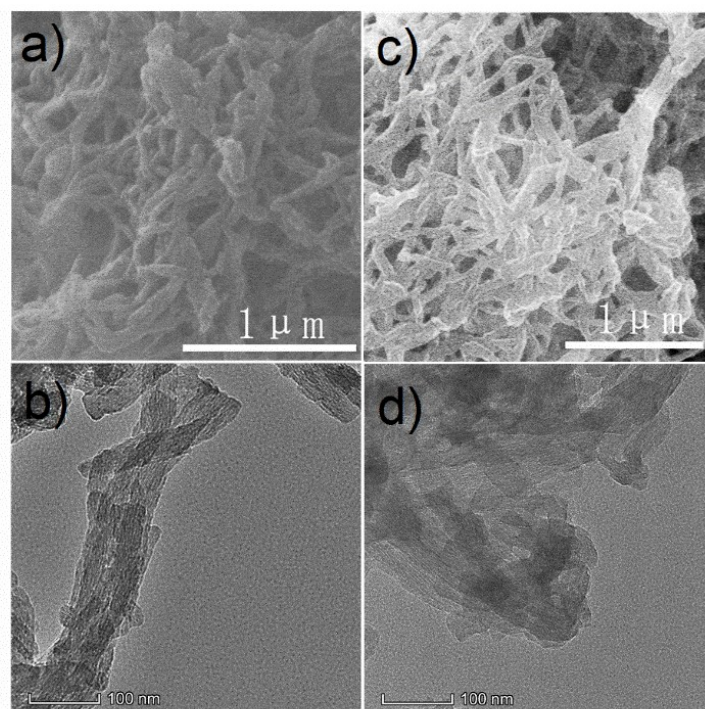

**Figure S3.** SEM and TEM images of the neat COF and CaCl<sub>2</sub>@COF-34%. a) SEM image of the neat COF, b) TEM image of the neat COF, c) SEM image of CaCl<sub>2</sub>@COF-34%, and d) TEM image of CaCl<sub>2</sub>@COF-34%.

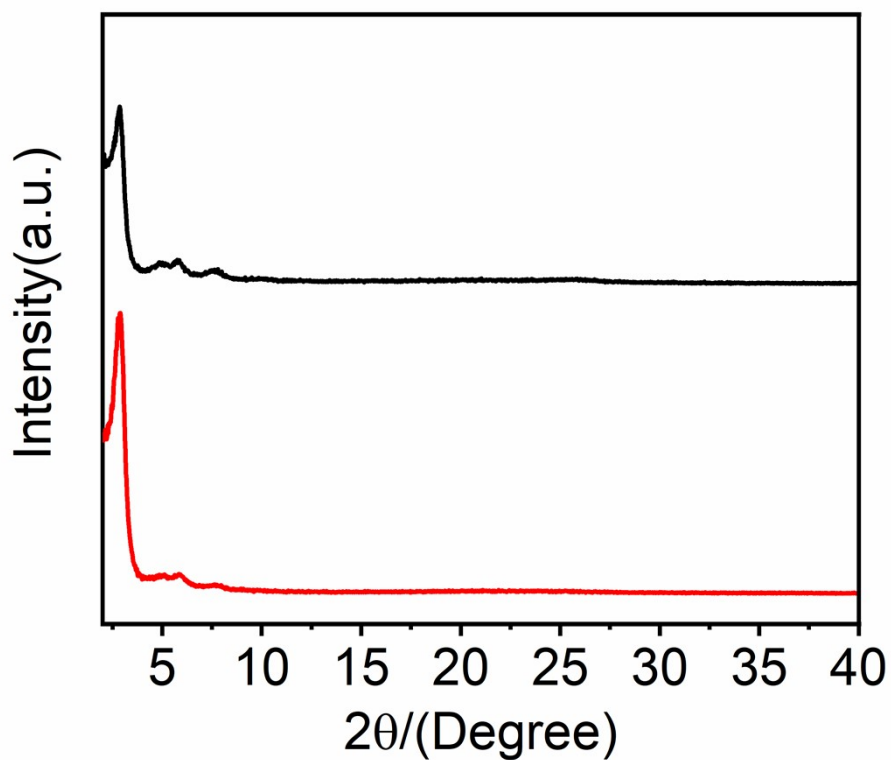

**Figure S4.** PXRD patterns of CaCl<sub>2</sub>@COF-34% (black) after washing with water in comparison with that of the neat COF (red).

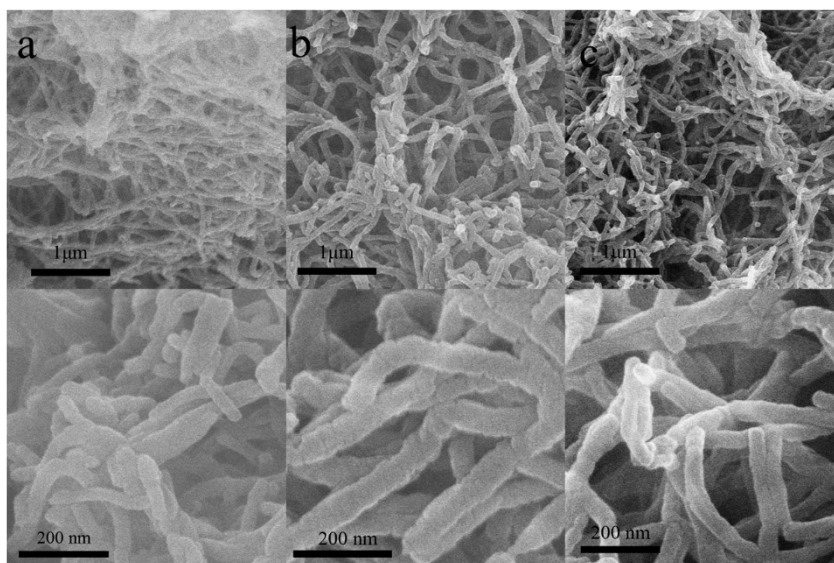

**Figure S5.** SEM images of the hybrid COF. a) CaCl<sub>2</sub>@COF-6%, b) CaCl<sub>2</sub>@COF-11%, and c) CaCl<sub>2</sub>@COF-26%.

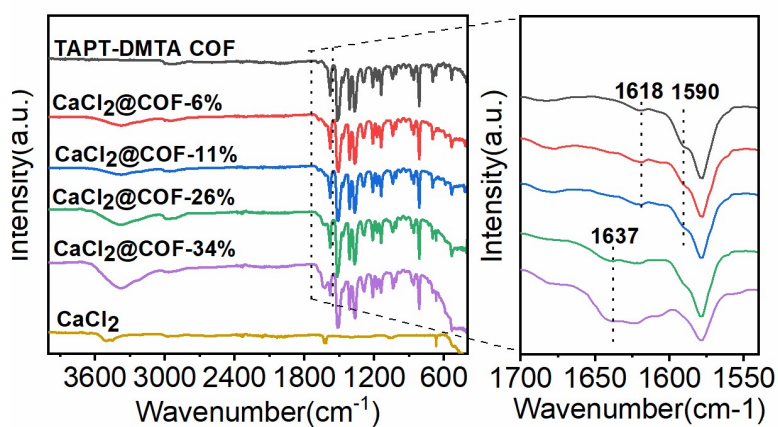

**Figure S6.** Mid-IR spectra of CaCl<sub>2</sub>@COF-x (x=0, 6%, 11%, 26%, 34%, 100%).

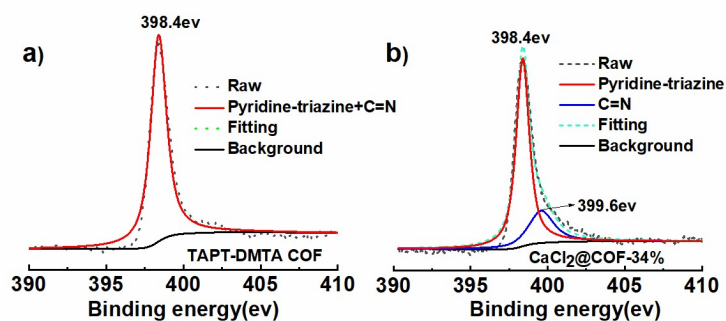

**Figure S7.** XPS spectra of N 1s for the neat COF and CaCl<sub>2</sub>@COF-34%. a) neat COF, b) CaCl<sub>2</sub>@COF-34%.

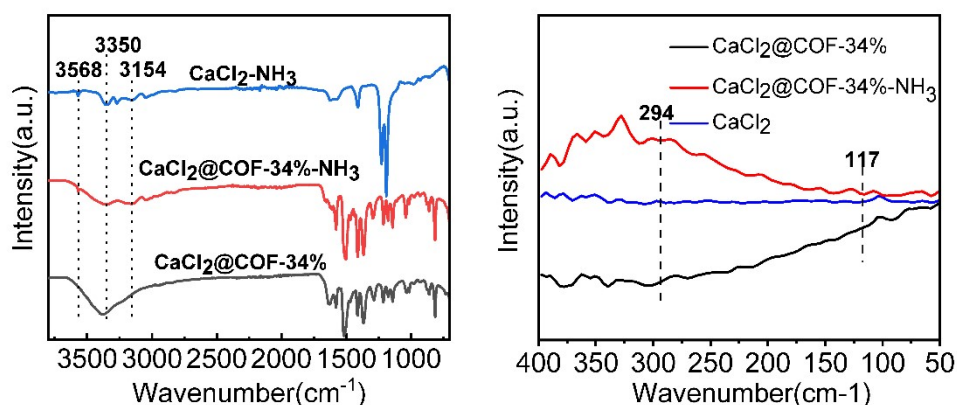

**Figure S8.** MIR and FIR spectra of  $\text{CaCl}_2@COF-34\%$  before and after  $\text{NH}_3$  absorption.

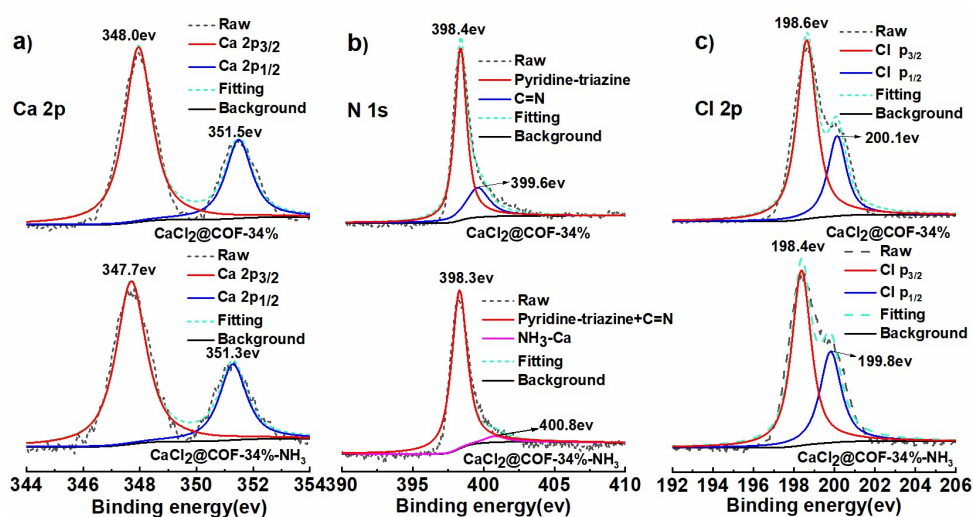

**Figure S9.** XPS spectra of Ca 2p, N 1s, and Cl 2p for  $\text{CaCl}_2@COF-34\%$  before and after adsorption of  $\text{NH}_3$ . a) Ca 2p, b) N 1s, and c) Cl 2p.

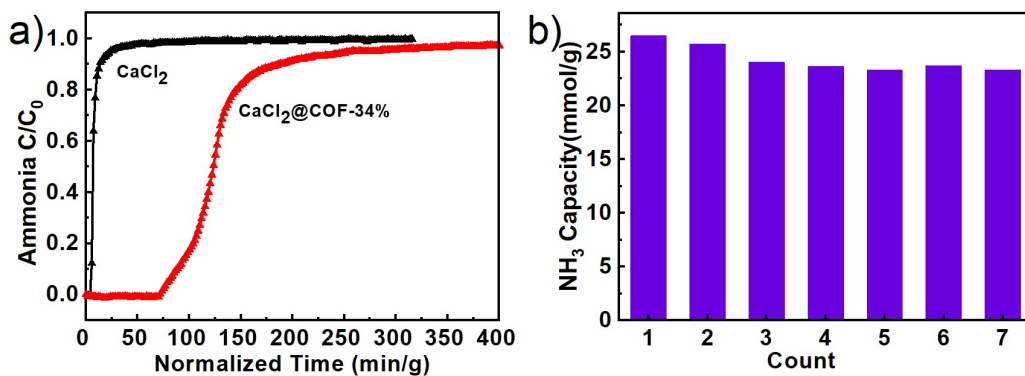

**Figure S10** a). Ammonia breakthrough curves at 50 °C for CaCl<sub>2</sub> (black) and CaCl<sub>2</sub>@COF-34% (red) under the NH<sub>3</sub> concentration of 9000 ppm with a flow rate of 40 mL/min. b). Regeneration of CaCl<sub>2</sub>@COF-34% after NH<sub>3</sub> capture.

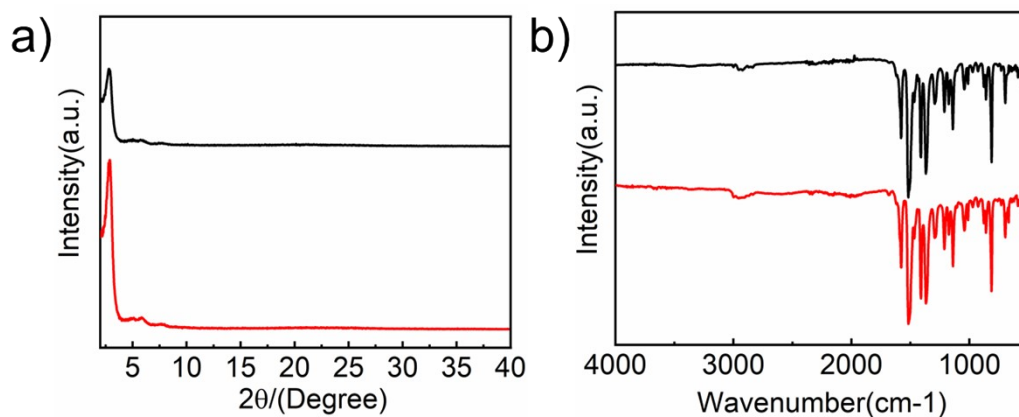

**Figure S11.** a) PXRD patterns and b) IR spectra of the pristine and recovered TAPT-DMTA COF. The recovered COF was obtained by washing CaCl<sub>2</sub>@COF-34% (after 7 absorption-desorption cycles of CaCl<sub>2</sub>@TAPT-DMTA-34% at 25 °C and 1bar) with methanol to remove CaCl<sub>2</sub>. The black curve is for COF after washing with methanol, and the red curve is for pristine COF.



### Section S3. Tables S1-3

**Table S1.** The Ca content, NH<sub>3</sub> uptake capacity at 25 °C and 1 bar, and ratio of  $n(\text{CaCl}_2)$  to  $n(\text{NH}_3)$  for the hybrid COFs

| Sample                     | ICP/% | NH <sub>3</sub><br>uptake/mmol/g | $n(\text{CaCl}_2): n(\text{NH}_3)$ |
|----------------------------|-------|----------------------------------|------------------------------------|
| CaCl <sub>2</sub> @COF-6%  | 6.3   | 6.2                              | 1/5.97                             |
| CaCl <sub>2</sub> @COF-11% | 11.3  | 8.7                              | 1/5.93                             |
| CaCl <sub>2</sub> @COF-26% | 26.0  | 17.2                             | 1/6.39                             |
| CaCl <sub>2</sub> @COF-34% | 34.2  | 26.5                             | 1/7.96                             |

$n(\text{CaCl}_2): n(\text{NH}_3) = [1000 \cdot w / M(\text{CaCl}_2)]: [\text{NH}_3 \text{ capacity (hybrid COF)} - \text{NH}_3 \text{ capacity (neat COF)} \cdot (1-w)]$ , w is the mass fraction of CaCl<sub>2</sub> loaded in the COF.

**Table S2.** The BET surface area and pore volume of hybrid COFs

| Sample                     | BET surface area/m <sup>2</sup> /g | pore volume/cm <sup>3</sup> /g |
|----------------------------|------------------------------------|--------------------------------|
| CaCl <sub>2</sub> @COF-6%  | 2127                               | 1.864                          |
| CaCl <sub>2</sub> @COF-11% | 1717                               | 1.414                          |
| CaCl <sub>2</sub> @COF-26% | 963                                | 1.091                          |
| CaCl <sub>2</sub> @COF-34% | 240                                | 0.654                          |

**Table S3.** Summary of the top performing porous materials

| Material                                                         | Material type                        | Capacity /mmol g <sup>-1</sup> | NH <sub>3</sub> packing density /g cm <sup>-3</sup> | Reference |
|------------------------------------------------------------------|--------------------------------------|--------------------------------|-----------------------------------------------------|-----------|
| CaCl <sub>2</sub> @TAPT-DMTA-34%                                 | Covalent organic framework composite | 26.5                           | 0.689                                               | This work |
| [BOHmim][Zn <sub>2</sub> C <sub>l<sub>5</sub>]@MIL-101(Cr)</sub> | Metal organic framework composite    | 24.12                          | -                                                   | 3         |
| Mg <sub>2</sub> (dobpdc)                                         | Metal organic framework              | 23.9                           | 0.564                                               | 4         |

|                                      |                            |      |       |   |
|--------------------------------------|----------------------------|------|-------|---|
| CoHCC                                | Porous dye                 | 21.9 | 0.471 | 5 |
| Co <sub>2</sub> Cl <sub>2</sub> BBTA | Metal organic framework    | 18.0 | 0.610 | 6 |
| COF-10                               | Covalent organic framework | 15.0 | 0.315 | 7 |
| MFM-300(Al)                          | Metal organic framework    | 13.9 | 0.622 | 8 |
| Amberlyst 15                         | Ion-exchange resin         | 11.3 | 0.480 | 9 |
| 13X zeolite                          | Zeolite                    | 9.30 | 0.465 | 9 |
| MCM-41                               | Mesoporous silica          | 7.90 | 0.134 | 9 |

## Section S4. References

1. Q. L. Zhu, J. Li and Q. Xu, *J. Am. Chem. Soc.*, **2013**, 135, 10210-10213.
2. D. Mullangi, D. Chakraborty, A. Pradeep, V. Koshti, C. P. Vinod, S. Panja, S. Nair and R. Vaidhyanathan, *Small*, **2018**, 14, 1801233.
3. G. Han, C. Liu, Q. Yang, D. Liu and C. Zhong, *Chemical Engineering Journal*, 2020, 401, 126106.
4. D. W. Kim, D. W. Kang, M. Kang, J. H. Lee, J. H. Choe, Y. S. Chae, D. S. Choi, H. Yun and C. S. Hong, *Angew Chem Int Ed Engl*, 2020, 59, 22531-22536.
5. A. Takahashi, H. Tanaka, D. Parajuli, T. Nakamura, K. Minami, Y. Sugiyama, Y. Hakuta, S.-i. Ohkoshi and T. Kawamoto, *Journal of the American Chemical Society*, 2016, 138, 6376-6379
6. A. J. Rieth and M. Dincă, *Journal of the American Chemical Society*, 2018, 140, 3461-3466.
7. C. J. Doonan, D. J. Tranchemontagne, T. G. Glover, J. R. Hunt and O. M. Yaghi, *Nat Chem*, 2010, 2, 235-238.
8. H. G. W. Godfrey, I. da Silva, L. Briggs, J. H. Carter, C. G. Morris, M. Savage, T. L. Easun, P. Manuel, C. A. Murray, C. C. Tang, M. D. Frogley, G. Cinque, S. Yang and M. Schroder, *Angew Chem Int Ed Engl*, 2018, 57, 14778-14781.
9. J. Helminen, J. Helenius, E. Paatero and I. Turunen, *Journal of Chemical & Engineering Data*, 2001, 46, 391-399.
